# Supplementary material for: Prognostic Value of Chemotherapy Response Score in Advanced Ovarian Cancer: A Single-Center Analysis
Source: Research Square preprint supplement (doi:10.21203/rs.3.rs-5425478/v1), 2024-12-16
Supplement: Supplementary file 1 [file a759b2fafb8b1c1c73972123.docx]

**Table 4: Summary of Studies Evaluating CRS in Relation to PFS and OS**

| Study | Sample Size | Scoring System | Period of Enrollment | Results | HR, *p* |
| --- | --- | --- | --- | --- | --- |
| Böhm-2015 | 62 (TC)  71 (VC) | six-tier omental and adnexal  three-tier omental | 2009-2014  1999-2012 | a significantly improved PFS for mCRS 4-5 compared with mCRS 2-3  (adjusting for age, stage, and residual disease)  a significant OS benefit for mCRS 4-5  adnexal scores not associated with  PFS or  OS  improved PFS for mCRS3 compared with mCRS1-2  nonsignificant trend for OS | mCRS 2-3 vs mCRS 4-5:  median survival, 11.3 vs 32.1 months;  aHR, 6.13; 95% CI, 2.13 to 17.68; *p<0.001*  aHR, 24.97; 95% CI, 2.35 to 265.60; *p<0.01*  *p= 0.59*  *p= 0.12*  mCRS 1-2 vs mCRS 3: median survival, 12 vs 18 months;  aHR, 3.60; 95% CI, 1.69 to 7.66; *p<0.001*  mCRS 1-2 vs 3: median survival, 28.4 vs 45.1 months;  aHR, 1.81; 95% CI, 0.79 to 4.14; *p= 0.15* |
| Lee-2017 | 110 | three-tier omental and adnexal | 2006-2014 | improved PFS for mCRS3 compared with mCRS1-2  no significant difference in OS between mCRS 1–2 and mCRS 3  adnexal CRS showed no significant association with outcome | the median PFS of CRS 1–2 vs CRS 3  14.5 v 18.6 months, *p= 0.016*  *p= 0.902*  *p= 0.317* |
| Coghlan-2017 | 71 | three-tier omental | 2010-2014 | improved PFS for mCRS3 compared with mCRS1-2  no significant association for OS | HR, 2.0; 95% CI, 1.06-3.78; *p= 0.032*; median PFS, 26 months (mCRS3) vs  16 months (mCRS1-2)  mCRS 1-2 vs 3:  HR, 1.57; 95% CI, 0.68-3.65; *p= 0.291* |
| Ditzel-2018 | 68  (omental n=65)  (adnexal n=59) | three-tier omental and adnexal | 2005–2012 | improved PFS for AT mCRS3 compared with  AT mCRS1-2  no significant association with OS between  AT mCRS1-2 and AT mCRS3  adnexal CRS showed no significant association with PFS and  OS | AT mCRS 1-2 vs 3;  HR, 0.526; 95% CI, 0.306-0.904; *p= 0.020*  median PFS, 10.9 vs 18.9 months  AT mCRS 1-2 vs 3;  HR, 0.608; 95% CI, 0.319-1.16; *p= 0.131*  median PFS, 39.4 vs 53.6 months  *p=0.062*  *p=0.055* |
| Michaan-2018 | 132 | three-tier omental and adnexal | 2009–2014 | significantly longer PFS for mCRS 3,  with no significant OS difference  a significantly longer PFS but not OS for patients with ovCRS 3  significantly longer PFS for cCRS 3,  with no significant OS difference | *p<0.01*  median PFS = 7.5, 12, and 17 months for ovCRS 1, 2, and 3, p= 0.012  *p<0.01* |
| Santaro-2019 | 161 | three-tier omental and adnexal | 2014–2017 | worsened PFS with mCRS1 and ovCRS1-2 ,  compared with mCRS3 and ovCRS3  worsened OS with mCRS1 compared with mCRS3 | mCRS1 vs mCRS3:  HR, 2.17; 95% CI, 1.41–3.33; *p= 0.0004*  mCRS2 vs. mCRS3:  HR, 2.34; 95% CI, 1.35–4.04; *p= 0.002*  ovCRS1 vs. ovCRS3:  HR, 2.53; 95% CI, 1.50–4.24; *p= 0.001*  ovCRS2 vs. ovCRS3:  HR, 1.90; 95% CI, 1.08–3.37; *p= 0.03*  mCRS1 vs. mCRS3:  HR, 2.75; 95% CI, 1.29–5.86; *p= 0.01* |
| Böhm-2019 | 80 | three-tier omental | 2009-2015 | improved PFS with mCRS3 compared with mCRS2  improved OS with mCRS3 compared with mCRS2 | median PFS 13 months (mCRS2) and  27 months (mCRS3);  HR 0.39 (95% CI 0.21 to 0.70), *p= 0.002*  (adjusted for age, stage, and debulking status)  median OS was 31 months (mCRS2) and 66 months (mCRS3);  HR 0.17 (95% CI 0.07 to 0.44), *p= 0.0002* (adjusted for age, stage, and debulking status) |
| Zorzato-2019 | 108 | three-tier omental | 2007-2017 | improved PFS with mCRS3 compared with mCRS1  improved OS with mCRS3 compared with mCRS1 | HR, 0.35; 95% CI, 0.20 to 0.61; *p<0.0001*  HR, 0.38; 95% CI, 0.18 to 0.82; *p= 0.013* |
| Lawson-2020 | 158 | three-tier omental and adnexal | 2013-2018 | improved PFS with mCRS3 compared with mCRS1-2  no association with OS between mCRS1-2 and mCRS3  improved PFS for ovCRS3 compared with ovCRS1-2  no association with OS between ovCRS1-2 and ovCRS3  improved PFS for cCRS3 compared with cCRS1-2  no association with OS between cCRS1-2 and cCRS3 | HR = 0.612, 95% CI: 0.378-0.989, *p= 0.045*  HR = 0.96, 95% CI: 0.495-1.865, *p= 0.91*  HR=0.535, 95% CI: 0.297-0.963, *p= 0.037*  HR=0.734, 95% CI: 0.327-1.645, *p= 0.45*  HR = 0.364, 95% CI:0.148-0.896, *p= 0.028*  HR = 0.66, 95% CI:0.205-2.131, *p= 0.49* |
| Liontos-2020 | 48 | Three-tier omental and adnexal | 2011-2016 | Median PFS was associated with CRS at omentum  CRS at omentum was not associated with OS  adnexal scores not associated with  PFS or  OS | Median PFS was:  10.3 months (mCRS1) (95%CI 7.4–15.7), 14 months (mCRS2) (95% CI 12.2–22.9) 18.7 months (mCRS3) (95% CI 13.5–31.3) *p= 0.003*  Median OS was:  29.3 months (mCRS1) (95%CI 10.9-NR), 32 months (mCRS2) (95% CI 16.4–46.9)  42.3 months (mCRS3) (95% CI 30.8-NR)  *p= 0.182*  *p= 0.115*  *p= 0.428* |

*Abbreviations: CRS: chemotherapy response score, PFS: Progression-Free Survival, OS: Overall Survival, TC: Test Cohort, VC: Validation Cohort, ,*  *mCRS: omental chemotherapy response score, ovCSR: adnexal chemotherapy response score, cCSR: combined chemotherapy response score, HR: hazard ratio, aHR: adjusted hazard ratio, AT: After Training, NR: not reached*
