# Supplementary material for: Prognostic Value of Chemotherapy Response Score in Advanced Ovarian Cancer: A Single-Center Analysis
Source: Research Square preprint supplement (doi:10.21203/rs.3.rs-5425478/v1), 2024-12-16
Supplement: Supplementary file 2 [file ab440fa75031b8caaed3749b.docx]

**Table 1: Baseline Characteristics of the Cohort**

|  | CRS 1-2  (n=56) | CRS 3  (n=23) | p |
| --- | --- | --- | --- |
| Age, years (median) | 60 (38-80) | 58 (39-78) | 0.927 |
| Menopausal status  Pre-menopause  Post-menopause | 16 (28.6%)  49 (71.4%) | 4 (17.4%)  19 (82.6%) | 0.299 |
| Pre NACT CA 125 levels (median, IU/ml) | 1192.50 (259-10858) | 980 (270-8169) | 0.553 |
| Post NACT CA 125 levels (median, IU/ml) | 32.50 (7-450) | 29 (3-355) | 0.524 |
| Percent of CA 125 drop %, (median) | 96.32 (71.76-99.53) | 96.53 (81.08-99.86) | 0.742 |
| Stage  Stage IIIC  Stage IV | 47 (83.9%)  9 (16.1%) | 17 (73.9%)  6 (16.1%) | 0.350 |
| Presence of ascites at surgery, n  Present  Absent | 23 (41.1%)  33 (58.9%) | 8 (34.8%)  15 (65.2%) | 0.603 |
| NACT cycles  3-4  >4 | 23 (41.1%)  33 (58.9%) | 10 (43.5%)  13 (56.5%) | 0.844 |
| Time to chemotherapy after interval debulking surgery, days (median) | 30 (15-75) | 47 (24-95) | **0.001** |
| Omentum CRS  Score 1-2  Score 3 | 39 (69.6%)  17 (30.4%) | 7 (30.4%)  16 (69.6%) | **0.001** |
| Recurrence, N  Present  Absent | 43 (76.8%)  13 (23.2%) | 16 (69.6%)  7 (30.4%) | 0.503 |
| Median follow up, months | 48.50 (15-104) | 72 (24-129) | **0.014** |
| **Table 2. Univariate and multivariate analyses for prognostic factors for disease-free survival in the entire cohort**   | **Variable** | **Univariate analysis**  **HR 95% CI *P*** | **Multivariate analysis**  **HR 95% CI *P*** | | --- | --- | --- | | Age | 0.912 |  | | Menopausal status (post-menopause vs. pre-menopause) | 0.730 |  | | Pre NACT CA 125 levels | 0.443 |  | | Post NACT CA 125 levels | 0.564 |  | | Percent of CA 125 drop | 0.878 |  | | Stage (IV vs. IIIC) | 0.690 |  | | Ascites (present vs. absent) | 0.168 | 0.755 | | NACT cycles (>4 vs. 3-4) | 0.059 | 0.074 | | Time to chemotherapy after interval debulking surgery | 0.079 | 0.460 | | Adnexa CRS (1-2 vs. 3) | **2.10 1.14 – 3.86 0.016** | 0.096 | | Omentum CRS (1-2 vs. 3) | **2.08 1.22 – 3.54 0.007** | 0.112 |   **Abbreviations:**  HR: Hazard ratio  CI: Confidence Interval  LN: Lymph node  **Table 3. Univariate and multivariate analyses for prognostic factors for overall survival in the entire cohort**   | **Variable** | **Univariate analysis**  **HR 95% CI *P*** | **Multivariate analysis**  **HR 95% CI *P*** | | --- | --- | --- | | Age | 0.992 |  | | Menopausal status (post-menopause vs. pre-menopause) | 0.756 |  | | Pre NACT CA 125 levels | 0.423 |  | | Post NACT CA 125 levels | 0.675 |  | | Percent of CA 125 drop | 0.363 |  | | Stage (IV vs. IIIC) | 0.690 |  | | Ascites (present vs. absent) | **2.59 1.43 – 4.70 0.002** | 1.86 1.00 – 3.48 0.050 | | NACT cycles (>4 vs. 3-4) | 0.153 | 0.198 | | Time to chemotherapy after interval debulking surgery | 0.213 | 0.838 | | Adnexa CRS (1-2 vs. 3) | **2.62 1.24 – 5.53 0.011** | 0.182 | | Omentum CRS (1-2 vs. 3) | **3.56 1.77 – 7.16 <0.001** | **2.69 1.26 – 5.76 0.010** |   **Abbreviations:**  HR: Hazard ratio  CI: Confidence Interval  LN: Lymph node  sdcc  c  fgb | | | |
